# Supplementary material for: Difunctional Hydrogel Optical Fiber Fluorescence Sensor for Continuous and Simultaneous Monitoring of Glucose and pH
Source: MDPI journal article supplement (doi:10.3390/bios13020287), 2023-02-17
Supplement: s1 [file s1]

# Difunctional hydrogel optical fiber fluorescence sensor for continuous and simultaneous monitoring of glucose and pH

Yangjie Li, Site Luo, Yongqiang Gui, Xin Wang, Ziyuan Tian, Haihu Yu\*

National Engineering Research Center of Fiber Optic Sensing Technology and Networks,  
Wuhan University of Technology, Wuhan 430070, China

\*E-mail: [hhyu@whut.edu.cn](mailto:hhyu@whut.edu.cn)

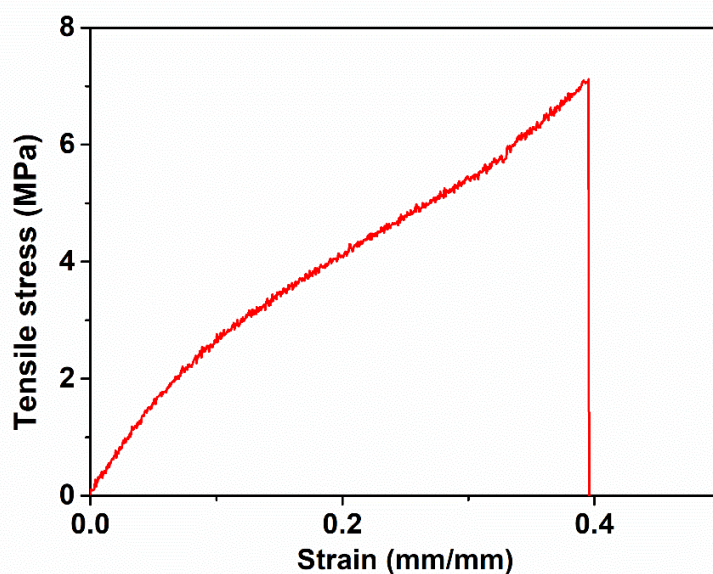

**Figure S1.** Mechanical measurements of the hydrogel the optical fiber.

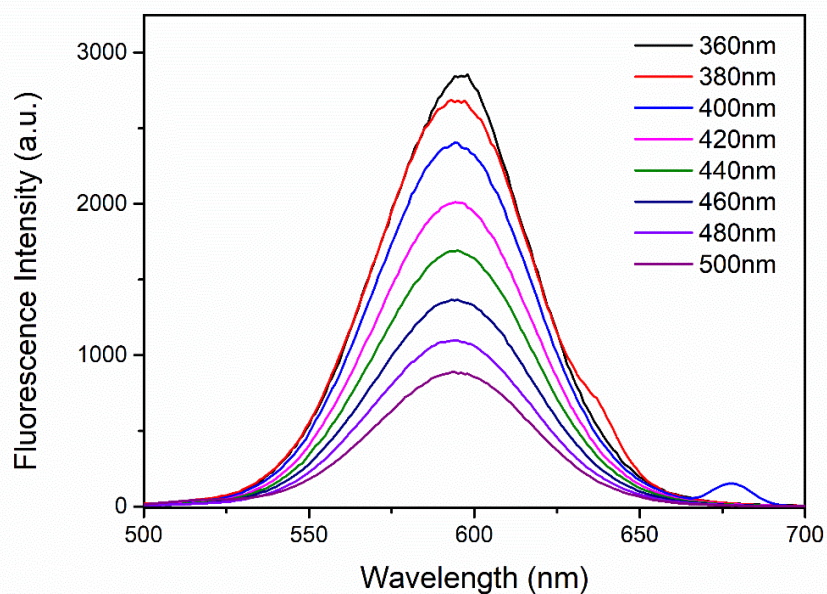

**Figure S2.** Excitation independence of CdTe QDs.

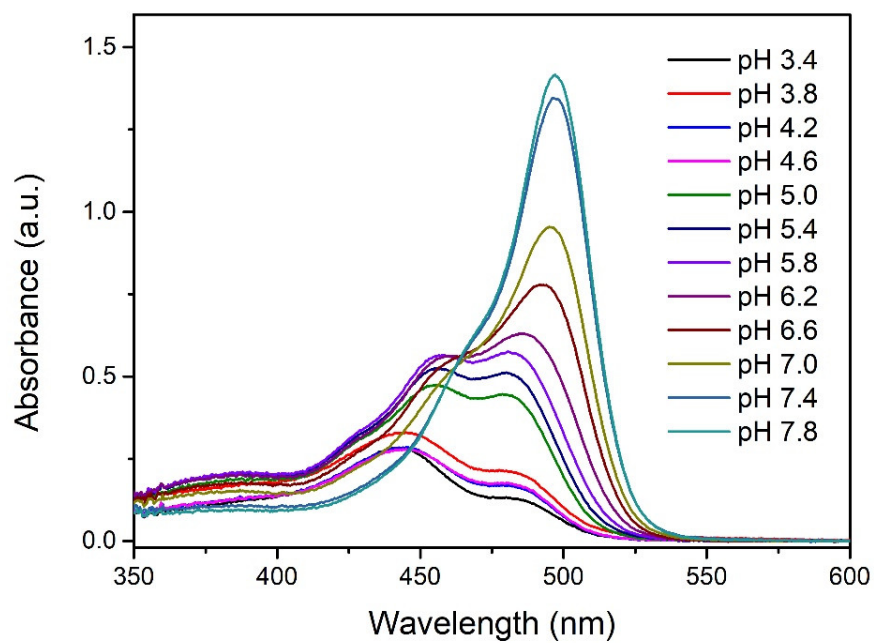

**Figure S3.** Absorption spectra of fluorescein derivative in different pH.

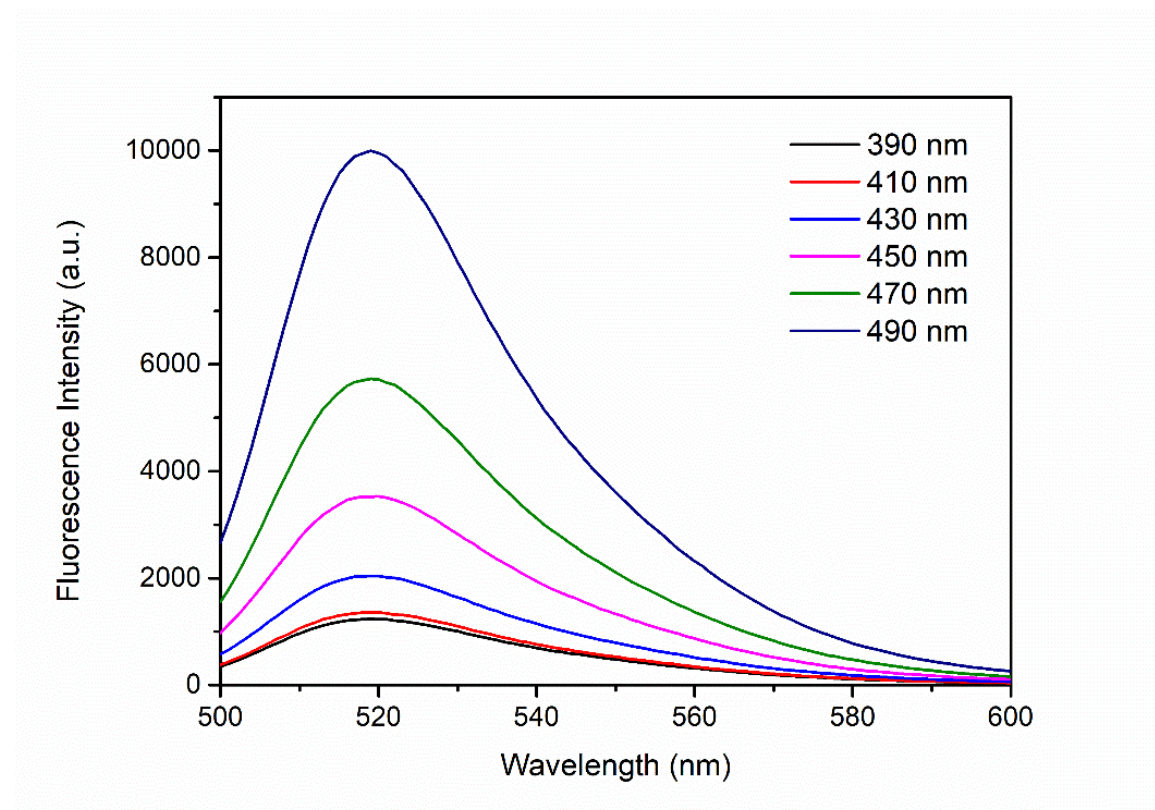

**Figure S4.** Excitation independence of fluorescein derivative.

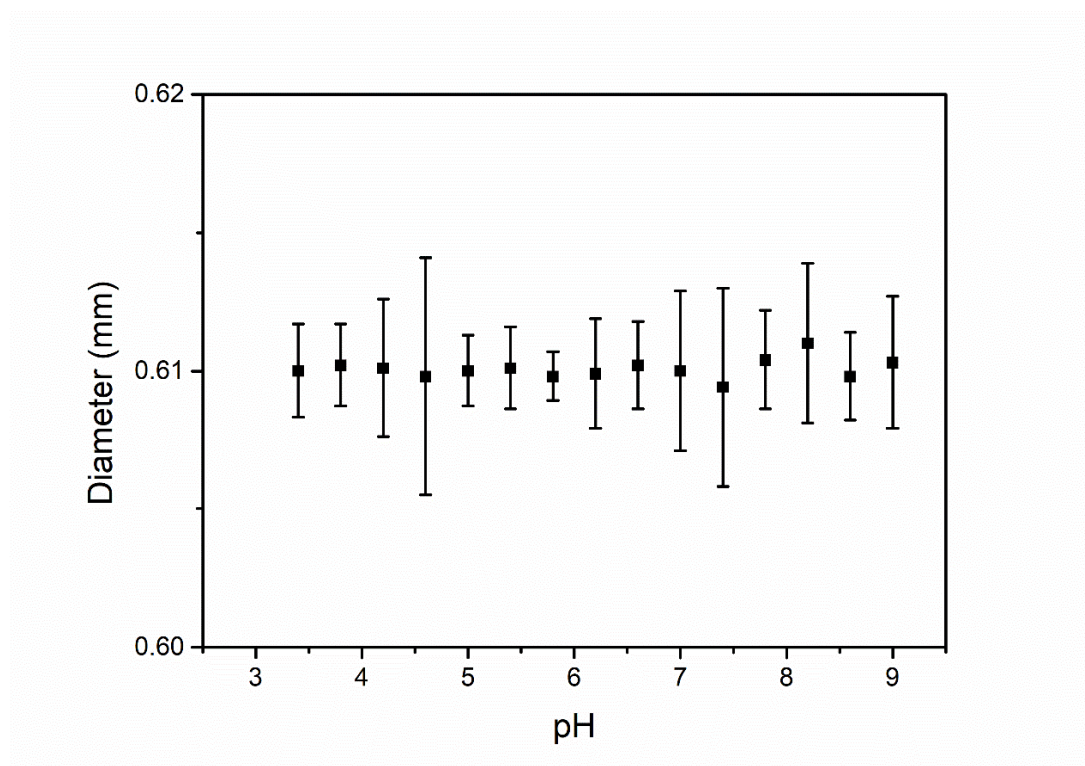

**Figure S5.** Diameter changes of the hydrogel fiber in different pH. Error bars are based on standard deviations ( $n = 3$ ).

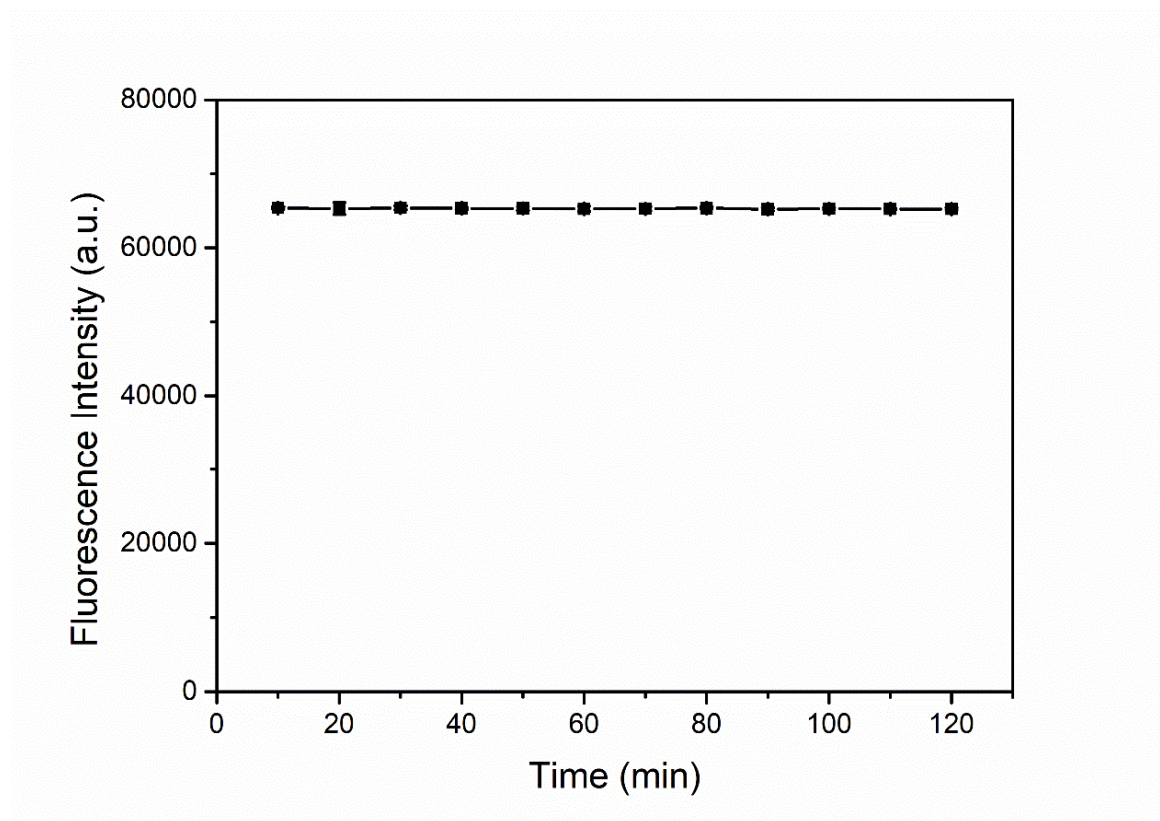

**Figure S6.** The pH sensor was stable under long time illumination.



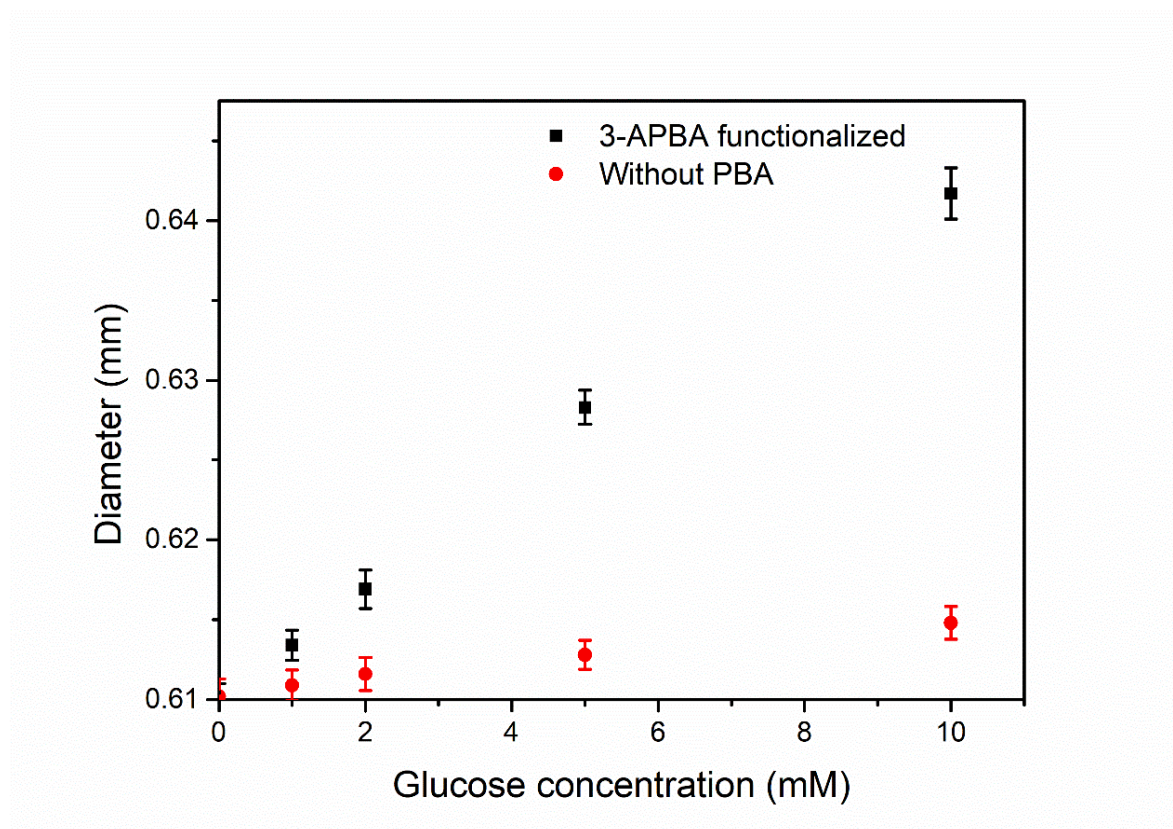

**Figure S7.** Diameter of the hydrogel fiber changes with glucose concentration. Error bars are based on standard deviations ( $n = 3$ ).

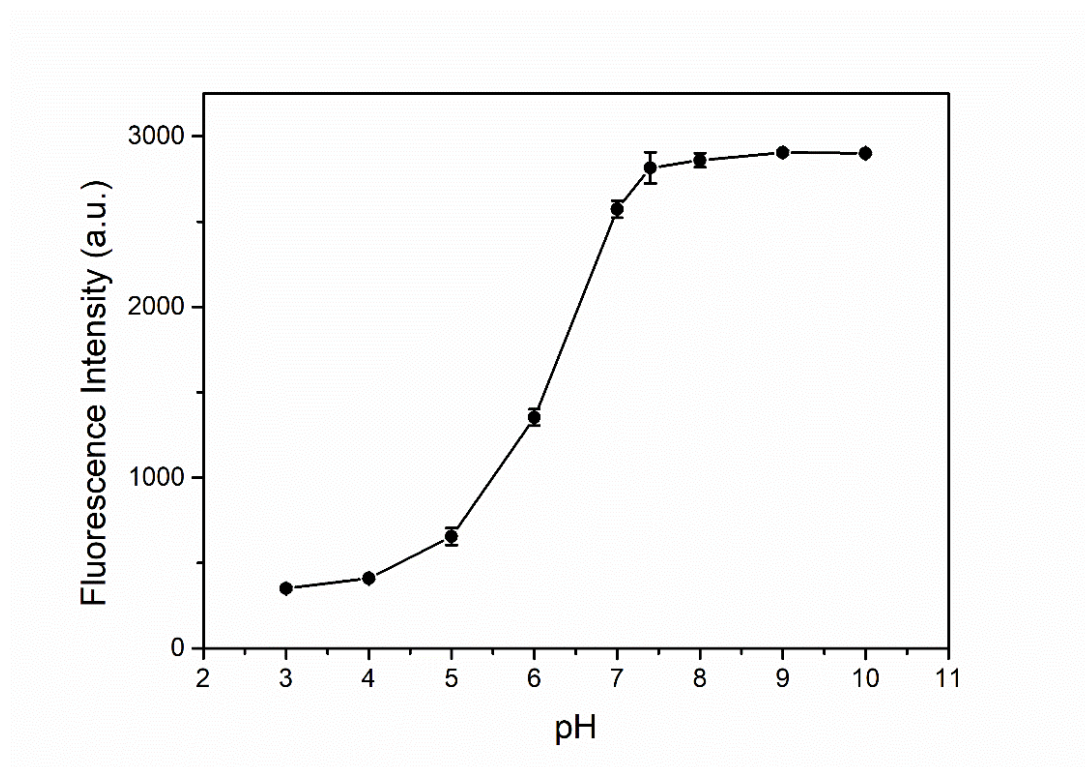

**Figure S8.** pH response of QDs from 3-10. Error bars are based on standard deviations ( $n = 3$ ).

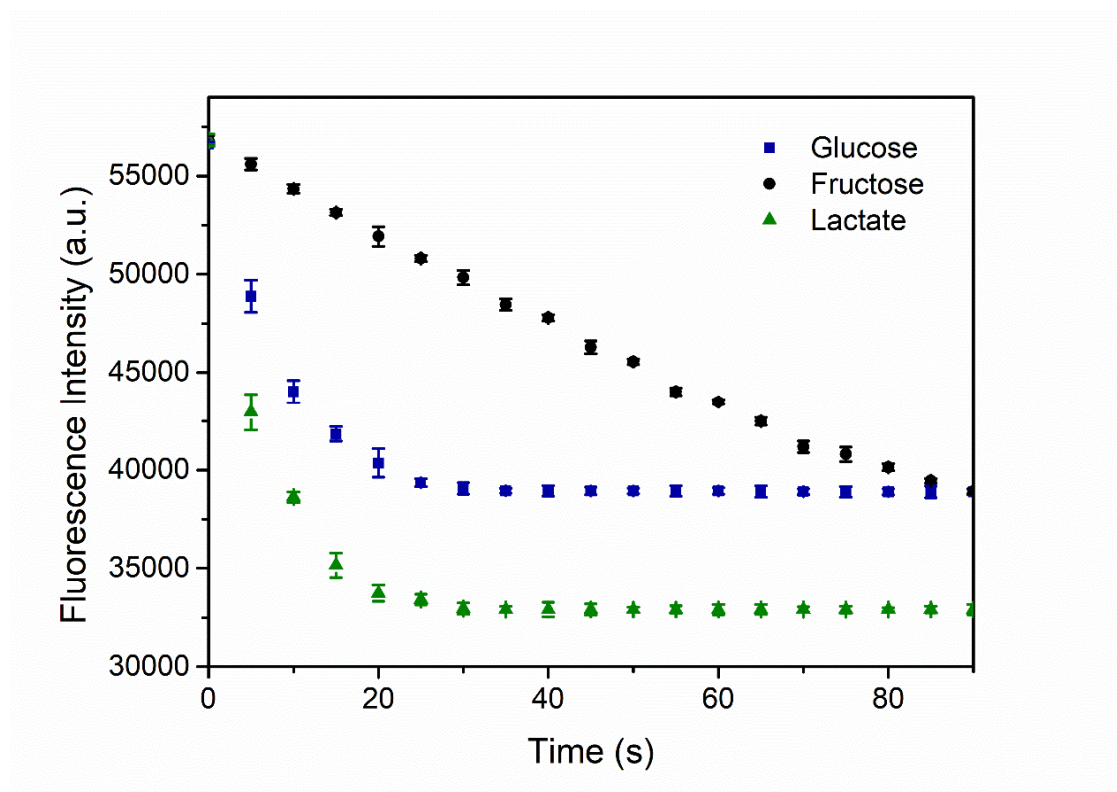

**Figure S9.** Time response of the sensor in glucose, fructose and lactate. The dots represent the fluorescence intensity recorded every 5 minutes. Error bars are based on standard deviations ( $n = 3$ ).

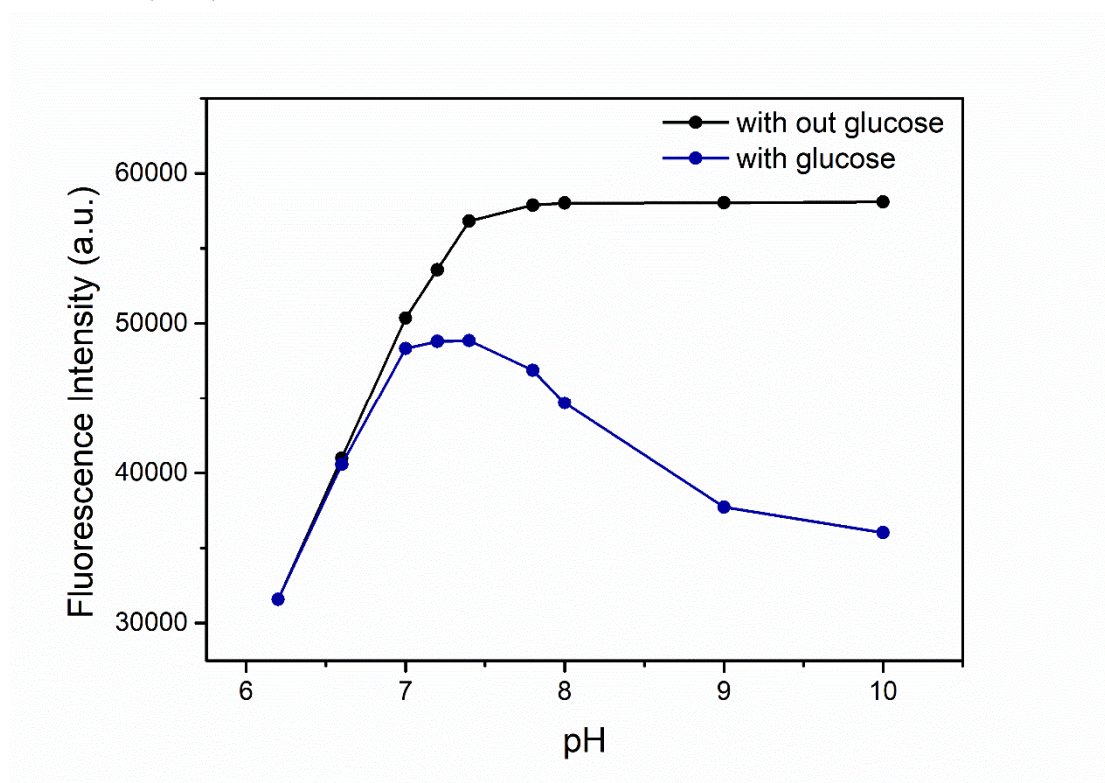

**Figure S10.** pH response of the sensor for glucose detection.



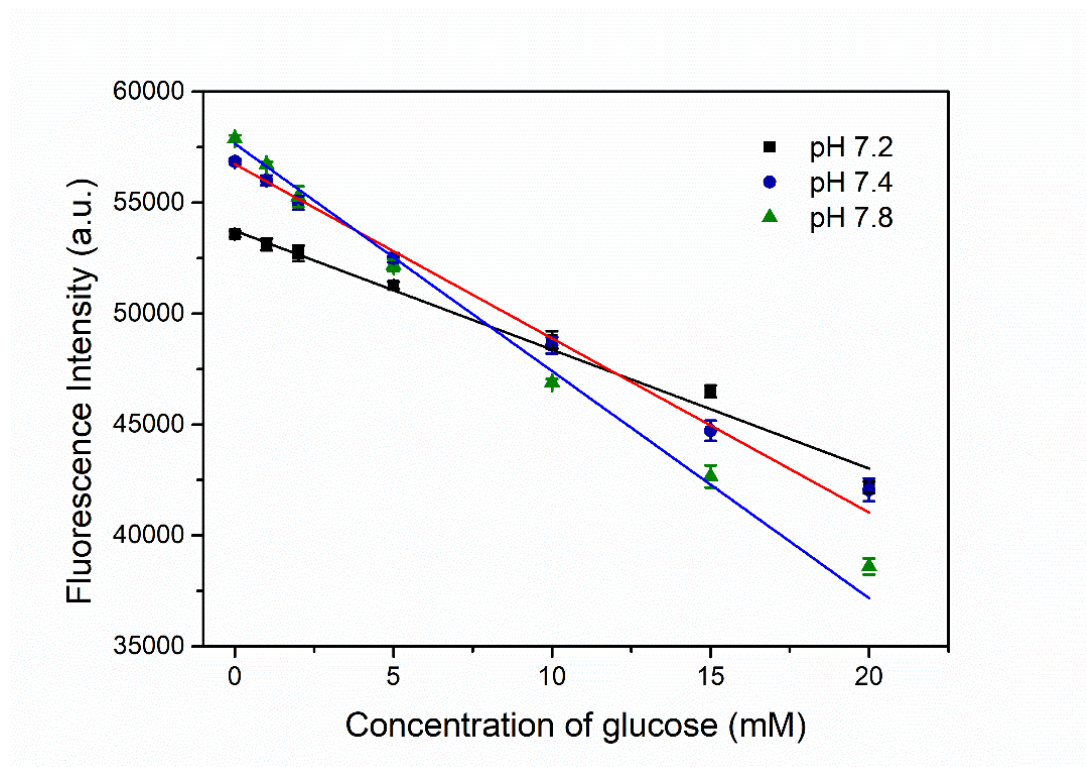

**Figure S11.** Detection curves of the sensor in different pH. Error bars are based on standard deviations ( $n = 3$ ).

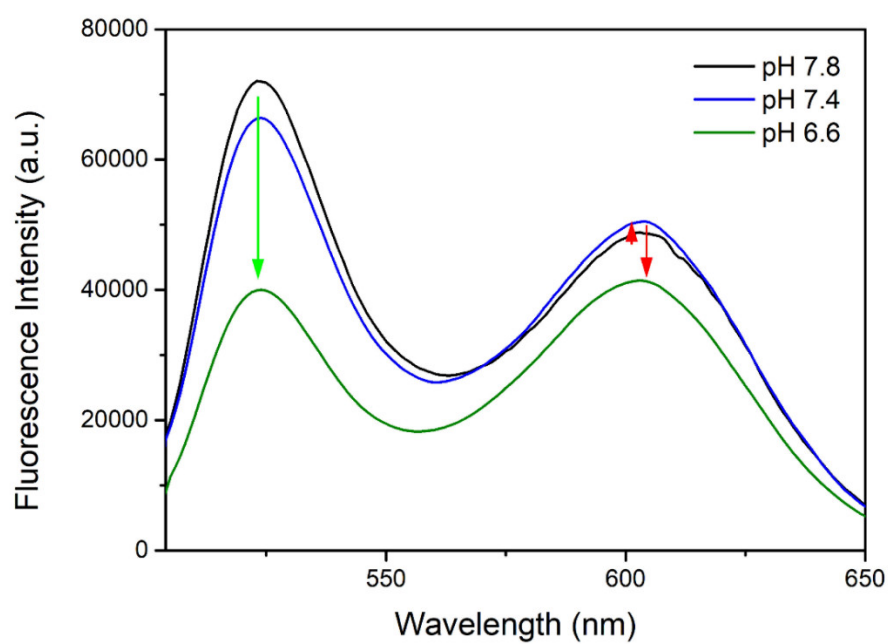

**Figure S12.** Fluorescence spectra of the sensor at pH 6.6, 7.4, 7.8 with 10 mM glucose.

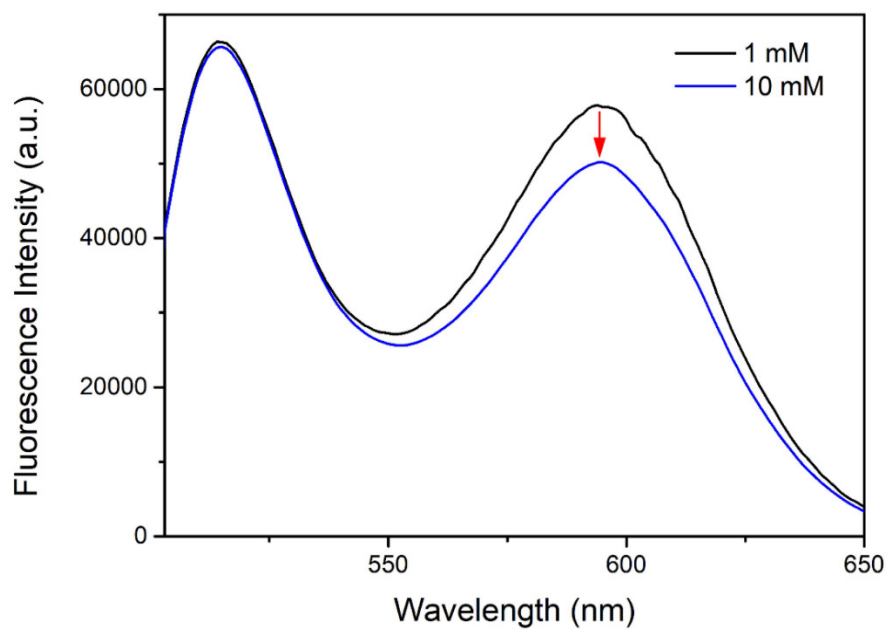

**Figure S13.** Fluorescence spectra of the sensor at pH 7.4 with 1 and 10 mM glucose.

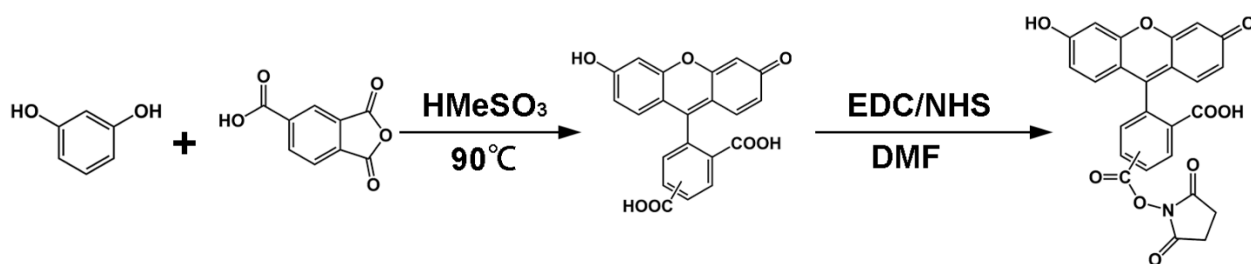

**Scheme S1.** Synthesis of fluorescein derivative.

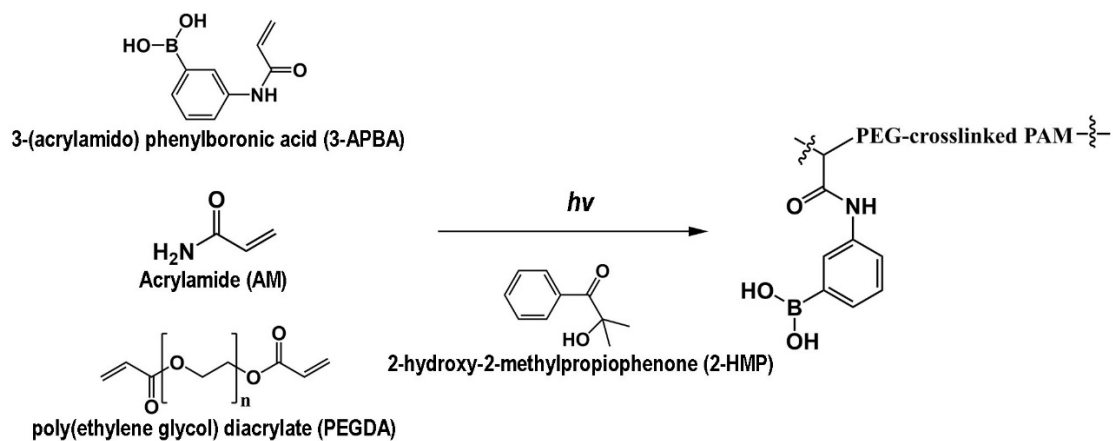

**Scheme S2.** Synthetic scheme of PAM-co-PEG-3-APBA.

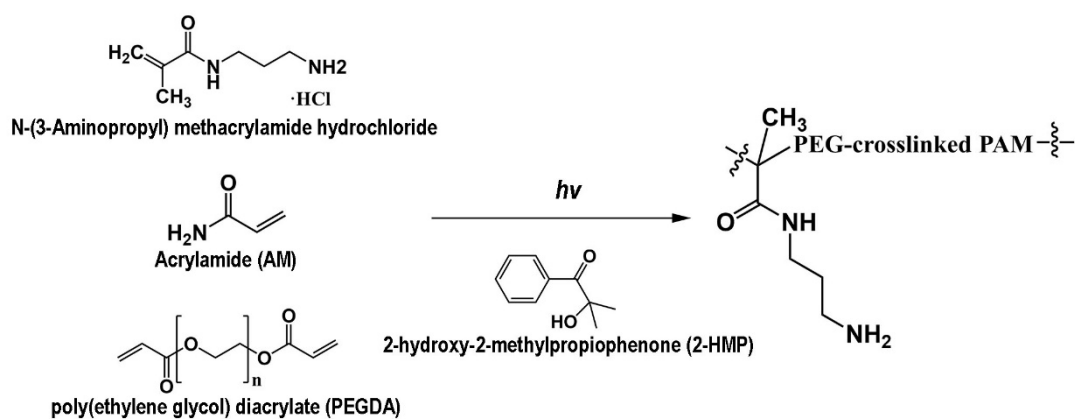

**Scheme S3.** Synthetic scheme of amino hydrogel.

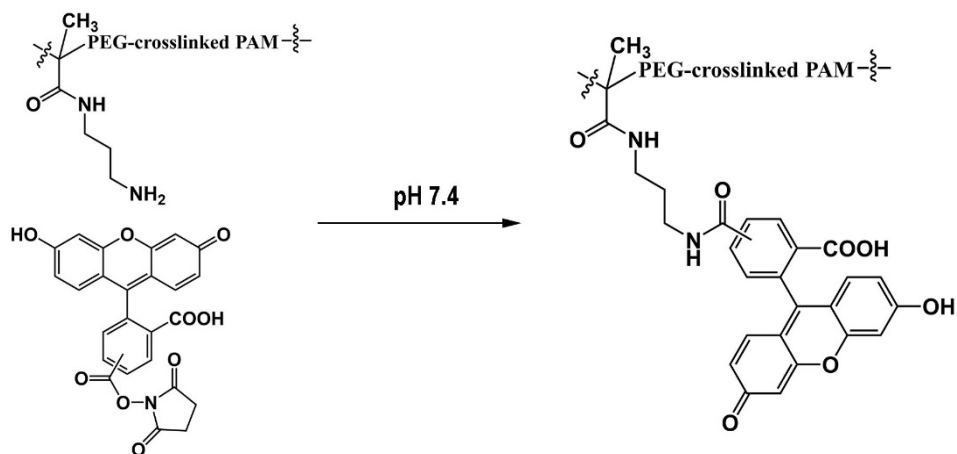

**Scheme S4.** Synthetic scheme of fluorescein derivative functionalized hydrogel.
